# Supplementary material
Source: PubMed Central journal article supplement (PMC7855810)
Supplement: NIHMS1651820-supplement-1.pdf [file NIHMS1651820-supplement-1.pdf]

## 1 **Supplementary Materials**

## 2 **Supplementary Methods**

### 3 Person Recognition Task

4 Participants ( $N_{\text{participants}} = 14$ ,  $n_{\text{sessions}} = 40$ ) were instructed to learn a series of 16-56 images of novel  
5 people [1] presented serially on a computer screen for 4 s each and preceded by a jittered interval of 4-  
6 4.5s. Stimulation was applied for a period of 1 s, between 2.2 and 2.7 s prior to a randomly selected half  
7 of stimuli. This encoding period was followed by a 30-second odd/even distractor task. During the  
8 retrieval stage, a randomly shuffled image set of previously seen photographs (“Targets”) and similar-  
9 looking photographs (“Lures”) were presented for 4 s each, and participants were given up to 16 s to rate  
10 whether the images were “new” or “old” and then rated their confidence on a continuous scale from -  
11 100 (“not confident”) to 100 (“very confident”) (Fig. S3A). The fraction of remembered images were  
12 calculated as described for the object recognition task. A subset of data from this task (13/14 participants  
13 and 38/40 sessions) were published previously [2].

14

### 15 Object Recognition Task

16 During the encoding stage, participants ( $N_{\text{participants}} = 9$ ,  $n_{\text{sessions}} = 36$ ) were presented with a series of 30-  
17 46 images depicting everyday objects that were downloaded from Google Image Search and the Hemera  
18 Object Database [3]. Nineteen undergraduate students from the UCLA Psychology Department Subject  
19 Pool completed the task, and the top and bottom 10% of rated objects were removed from the stimulus  
20 database to achieve suitable task difficulty level. To promote task engagement, participants were  
21 instructed to determine whether each presented object was “bigger or smaller than a shoebox” and to  
22 answer by key press. Images were shown for 4 s and interleaved with jittered fixation periods of 4-4.6 s.  
23 Stimulation was applied for 3 s, beginning 3 s prior to a randomly selected half of stimuli and  
24 terminating before stimulus onset (In 2 sessions, stimulation duration was only 1 s). Participants then

25 completed the 30-second odd/even distractor task. For each image shown during encoding, three images  
26 were shown, in random order, during the retrieval stage. These included the original image (“Target”), a  
27 very similar image (“Lure”), and a dissimilar image from the same object category (“Foil”). Participants  
28 were given up to 60 s to rate each image (each trial terminated with the participant’s response) on a six-  
29 point confidence scale, where “1,” “2,” and “3” indicated that the image was “new” (not seen during  
30 encoding) and “4,” “5,” and “6” indicated that the image was “old” (already viewed). Ratings of “1” and  
31 “6” indicated high confidence (“definitely”), “2” and “5” indicated medium confidence (“probably”),  
32 and “3” and “4” indicated low confidence (“maybe”) (Fig. S3B). Performance on this task was measured  
33 by the fraction of remembered images, defined as targets that were correctly categorized as old whose  
34 corresponding lure was correctly categorized as new.

35

### 36 Face-Name Associative Memory Task

37 Participants ( $N_{\text{participants}} = 6$ ,  $n_{\text{sessions}} = 11$ ) were presented with a series of either 16 or 32 novel face-name  
38 pairs and instructed to learn each pairing. Each face-name pair was shown for 4 s, interleaved with  
39 fixation periods of the same duration. Stimulation was applied for 3 s, beginning 3 s prior to a randomly  
40 selected half of stimuli. Following the 30-second odd/even distractor task, each image shown during the  
41 encoding stage was presented again, in random order. Participants were given 4 s to recall the name  
42 associated with each image. For participants with especially poor memory (1 participant; 3 sessions), the  
43 first letter of the name was presented as a cue during retrieval. After the retrieval phase, the experiment  
44 began again with the encoding phase, using the same set of images (with the same subset of images  
45 receiving stimulation) to give participants another opportunity to learn the associations. In total,  
46 participants saw each set of images six times (data were excluded if fewer than 6 blocks were  
47 completed). For each block, memory performance was calculated as the percentage of correctly  
48 identified names for stimulated and non-stimulated trials. Because we wanted to test the end result of

49 learning with or without stimulation, only the scores for the sixth block were included in the model (Fig.  
50 S3C).

51

## 52 Details of Electrode Localization Method

53 Methods for determining the location of the stimulating electrodes were as described previously [2].  
54 Briefly, a high-resolution post-operative computed tomography (CT) scan was co-registered (Fig. S1) to  
55 a pre-operative whole brain magnetic resonance imaging (MRI, TR 11 ms; TE 2.81 ms; flip angle 20  
56 degrees; matrix size  $256 \times 256$  mm; FOV 256 mm; in-plane resolution  $1 \times 1$  mm; slice thickness 1 mm;  
57 voxel size 1 mm isotropic) and high-resolution MRI (TR: 5300 ms; TE: 70 ms; flip angle: 178 degrees;  
58 matrix size:  $500 \times 500$  mm; FOV: 200 mm; in-plane resolution:  $0.4 \times 0.4$  mm; slice thickness: 3 mm,  
59 voxel size:  $0.4 \times 0.4 \times 3$  mm, 19 slices, Fig. 2) using BrainLab (Westchester, IL) stereo-tactic and  
60 localization software ([www.brainlab.com](http://www.brainlab.com)) [4, 5] and FSL FLIRT (FMRIB's Linear Registration Tool)  
61 [6, 7]. Bipolar macro- and micro-electrode contacts were manually delineated using visualization and  
62 tools in BrainLab. Since only the tip of the entire bundle of 8 micro-electrodes is visible in BrainLab, the  
63 tip of the micro-stimulation electrode was estimated by measuring 2 mm from the tip of the bundle to  
64 the first (most distal) macro-electrode contact. A much larger red crosshair (2 mm wide  $\times$  2 mm long,  
65 Fig. 2) was then used as a conservative estimate to represent the area in which the micro-stimulation  
66 electrode tip (100  $\mu$ m diameter) was located. One participant was excluded due to the proximity of their  
67 electrode being too close to the white/gray matter boundary. Medial temporal lobe regions (entorhinal,  
68 perirhinal, parahippocampal, and hippocampal subfields CA23DG [CA2, CA3, dentate gyrus], CA1, and  
69 subiculum) were delineated using the Automatic Segmentation of Hippocampal Subfields (ASHS [8, 9])  
70 software using boundaries determined from MRI visible landmarks that correlate with underlying  
71 cellular histology (Fig.1, S2) [10, 11]. White matter and cerebral spinal fluid areas were outlined using  
72 FSL FAST software [12]. Together, similar methods have been previously used to localize micro-

73 electrodes and investigate structural and functional dissociations within human medial temporal lobe  
74 subregions [13-15]. Each electrode contained macro-electrodes, spaced at 1.5 mm (3.5 mm center to  
75 center) intervals along the shaft (most distal 2 contacts were used for macro-stimulation), a single 100-  
76  $\mu\text{m}$  micro-electrode (used for micro-stimulation) at the distal tip 3 mm from the most distal macro-  
77 contact, and a bundle of seven 40- $\mu\text{m}$  micro-electrodes (not used for stimulation) 5 mm from the most  
78 distal macro-contact. Macro- and micro-electrode contacts were identified and outlined on the post-  
79 operative CT scan. To determine whether each micro- or macro-electrode fell within white or gray  
80 matter, the high-resolution MRI, with ASHS and FAST segmentation results, was overlaid with the co-  
81 registered electrode. At minimum, if the more distal of the two stimulating macro-electrodes fell within  
82 the white matter (angular bundle) region, it was classified as "white." The co-registered CT electrode  
83 locations and high-resolution MRIs of example participants are shown in Fig. S2. Table S3 includes  
84 additional information—both the localization result for each electrode contact as well as the  
85 corresponding clinical label.

86

### 87 Brain Imaging Parameters

88 MRI data were acquired on a Siemens Magnetom Prisma 3 Tesla system housed in the Department of  
89 Radiology at UCLA. The whole brain MRI images were collected over 176 axial slices using a T1-  
90 weighted gradient echo sequence (TR = 11 ms; TE = 2.81 ms; flip angle = 20 degrees; matrix size = 256  
91 x 256 mm; FOV = 256 mm; in-plane resolution = 1 x 1 mm; slice thickness 1 mm; voxel size = 1 mm  
92 isotropic). A high-resolution T2 weighted structural scan was also acquired for each participant (TR =  
93 5300 ms; TE = 70 ms; flip angle = 178 degrees; matrix size = 500 x 500 mm; FOV = 200 mm; in-plane  
94 resolution = 0.4 x 0.4 mm; slice thickness = 3 mm, voxel size = 0.4 x 0.4 x 3 mm, 19 slices).

95

96 Spiral computed CT scans were performed on a 64-row multi-detector CT scanner. All scans had a pre-  
97 contrast series and single phase, post-contrast acquisition, synchronized using bolus tracking technique

98 for arterial phase. Omnipaque 350 contrast media volume was set as 100 cc with an infusion rate of 3.0  
99 cc/s.

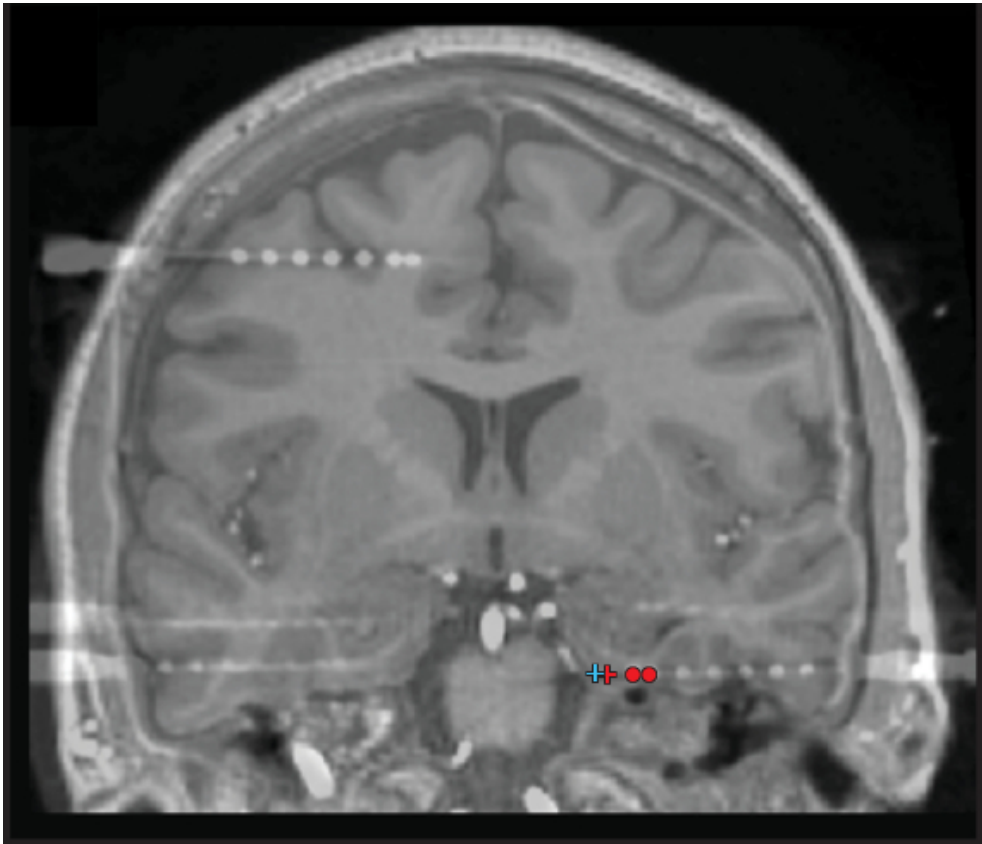

100

101 **Fig. S1. Co-registered MRI and CT scan.** Example co-registration of a high-resolution T2 MRI  
102 overlaid onto a corresponding high-resolution CT. Macro-electrodes are shown as red dots, while micro-  
103 electrode locations are presented as red (stimulating electrode) or blue (recording electrodes) crosshairs.

104

105

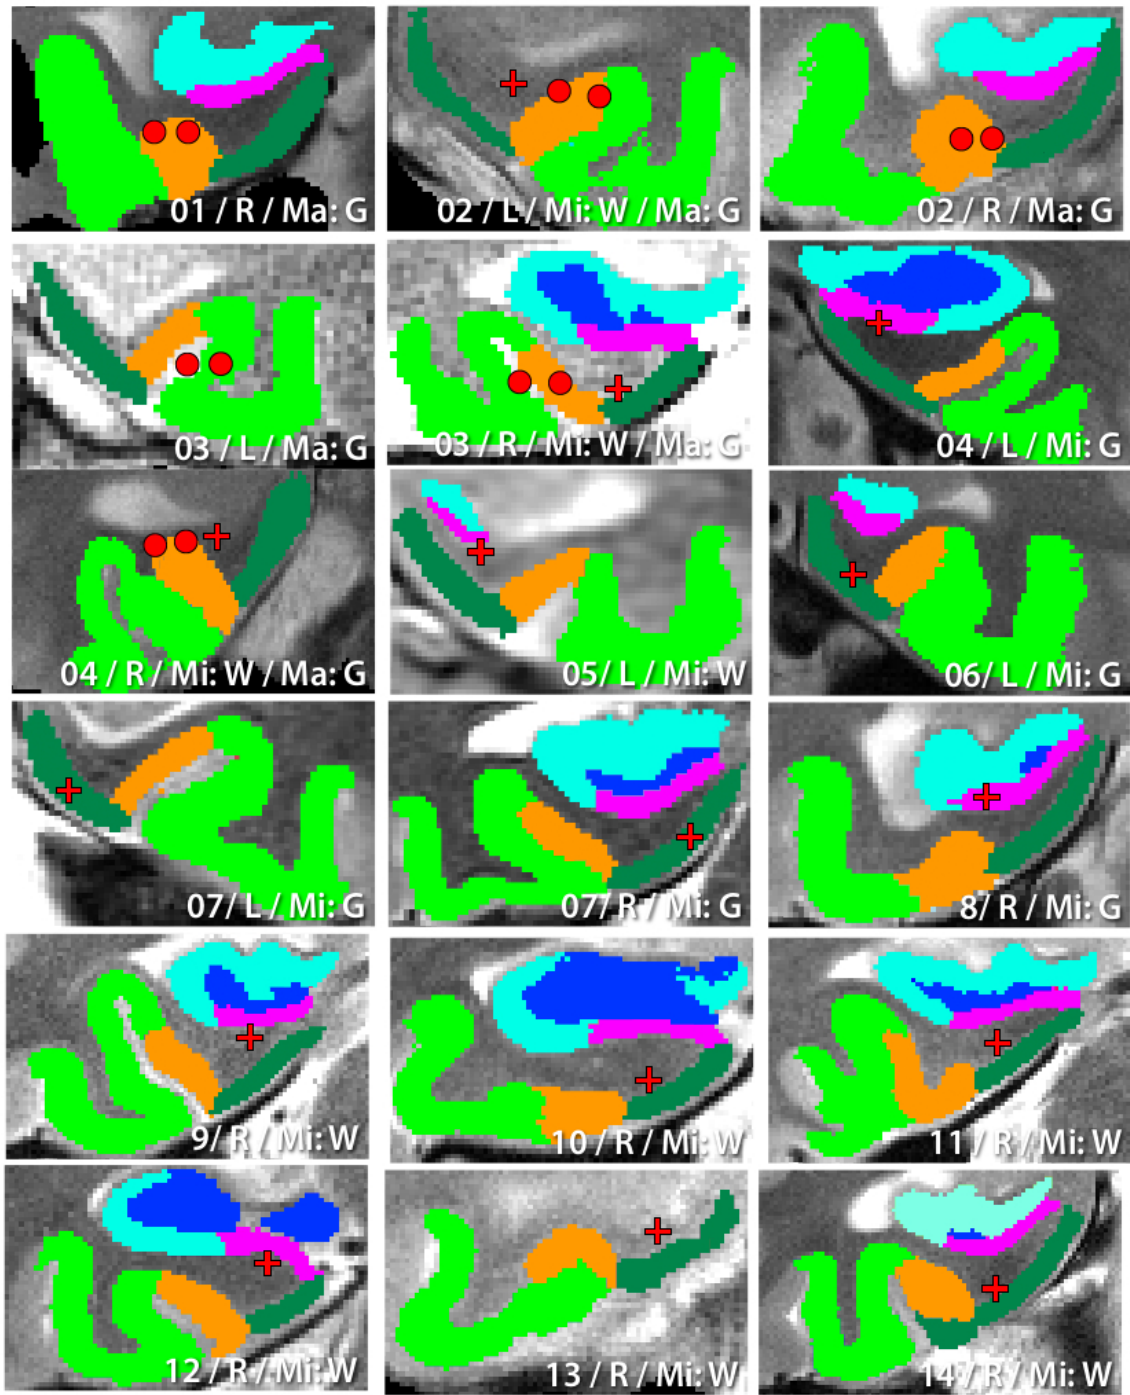

+ 100- $\mu$ m Microelectrode    ● Macroelectrode  
 CA1   CA23-DG   Subiculum   Entorhinal Cortex   Parahippocampal Gyrus   Perirhinal Cortex   Fusiform Gyrus

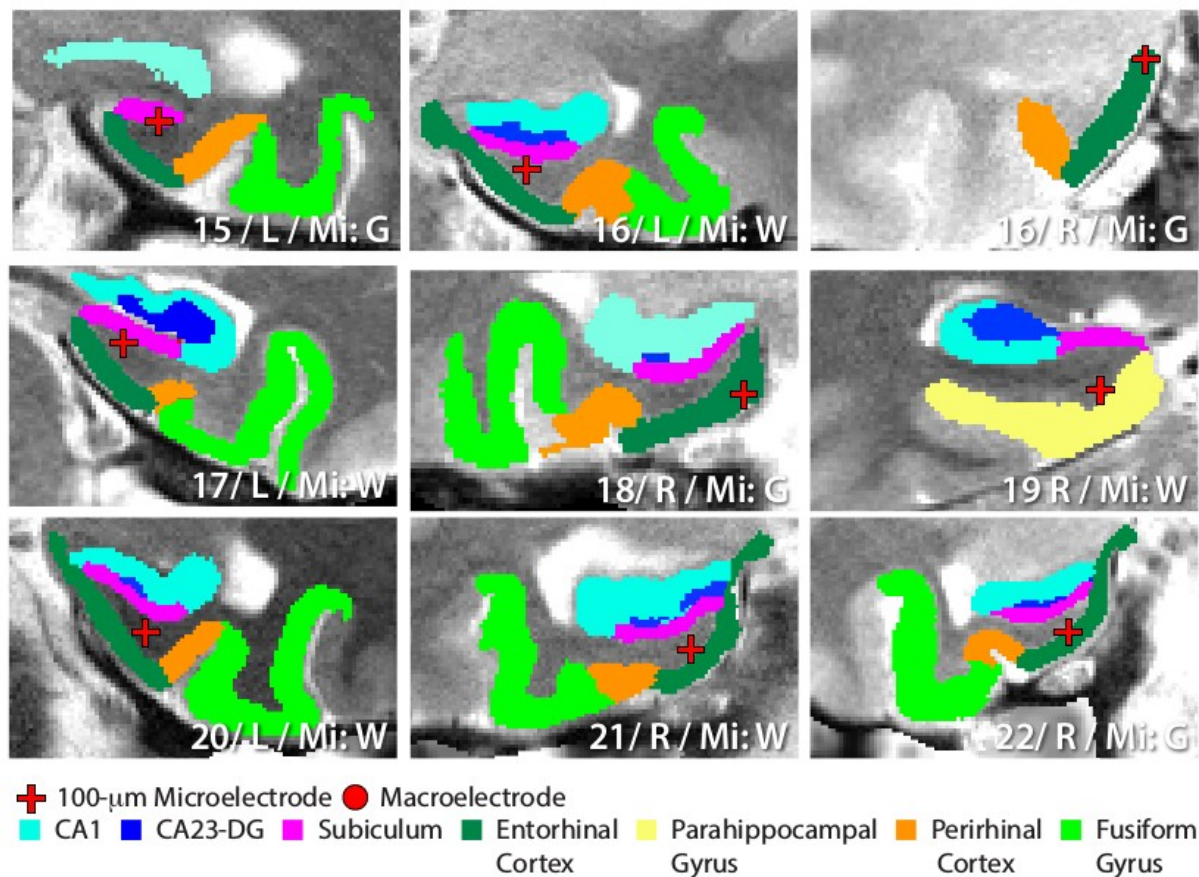

107

108 **Fig. S2. Electrode localizations for each study participant**

109 Electrode localizations for each study participant are labeled with corresponding *participant (#) /*  
 110 *hemisphere (left [L] or right [R]) / electrode placement (micro [Mi.] and/or macro [Ma.] in white [W]*  
 111 *or gray [G] matter).*

112

113

114

| Demographics and Clinical Characteristics of Participants |     |            |                 |            |                 |                  |                  |                    |
|-----------------------------------------------------------|-----|------------|-----------------|------------|-----------------|------------------|------------------|--------------------|
| Participant ID                                            | Age | Handedness | Verbal IQ       | Digit Span | Verbal Memory   |                  | Visual Memory    | Executive Function |
|                                                           |     |            |                 |            | WMS             | CVLT             |                  |                    |
| 1                                                         | 51  | R          | 90 <sup>a</sup> | 16         | 63              | 21 <sup>c</sup>  | < 1              | 27                 |
| 2                                                         | 20  | R          | 108             | 16         | 37              | 69               | 2                | 46                 |
| 3                                                         | 40  | R          | 98              | 16         | 2               | 1                | 5 <sup>d</sup>   | 5                  |
| 4                                                         | 45  | A          | 85              | 12         | 25              | < 1 <sup>c</sup> | < 1              | < 1                |
| 5                                                         | 34  | R          | 85              | 8.1        | < 1             | < 1              | < 1              | 63                 |
| 6                                                         | 35  | L          | 105             | 37         | 50              | 50               | 7                | 63                 |
| 7                                                         | 30  | A          | 134             | 37         | 63              | 50               | 96               | 92                 |
| 8                                                         | 27  | R          | 98              | 37         | 16              | 7                | 9 <sup>d</sup>   | 16                 |
| 9                                                         | 20  | R          | 102             | 37         | 50              | 50               | 12               | 63                 |
| 10                                                        | 26  | R          | 83 <sup>f</sup> | -          | 61 <sup>e</sup> | 8 <sup>e</sup>   | 22               | -                  |
| 11                                                        | 21  | R          | 95              | 9          | 37              | 2                | 8                | 21                 |
| 12                                                        | 49  | R          | 120             | 25         | 75              | 50               | 16               | 10                 |
| 13                                                        | 35  | R          | 91              | 9          | 16              | 69               | 14               | 16                 |
| 14                                                        | 28  | R          | 96              | 16         | 25 <sup>b</sup> | 69               | < 1 <sup>d</sup> | 27                 |
| 15                                                        | 27  | R          | 89              | 9          | -               | 16               | -                | -                  |
| 16                                                        | 33  | R          | 107             | 63         | 91              | 94               | 66               | 92                 |
| 17                                                        | 47  | R          | 112             | 63         | 5               | 4 <sup>c</sup>   | 16 <sup>d</sup>  | 56                 |
| 18                                                        | 53  | R          | 75              | 16         | 9               | 1                | 12 <sup>d</sup>  | 1                  |
| 19                                                        | 29  | R          | -               | -          | -               | -                | -                | -                  |
| 20                                                        | 44  | R          | -               | 50         | 99.6            | 16               | 82               | 32                 |
| 21                                                        | 47  | A          | 87              | 37         | 16              | 16               | < 1              | 16                 |
| 22                                                        | 21  | R          | -               | -          | -               | -                | -                | -                  |

116 **Table S1. Clinical characteristics of the study participants.**

117 Except as noted, Verbal and digit span (i.e., attention) were calculated with the use of the  
 118 Wechsler Adult Intelligence Scale [16], verbal memory by means of the verbal paired associates  
 119 delayed recall portion of the Wechsler Memory Scale (WMS) [16] and the long-delay free-recall  
 120 portion of the California Verbal Learning Test (CVLT) [17], visual memory with the use of the  
 121 30-minute delayed version of the Rey–Osterrieth Complex Figure Test [18] and executive  
 122 function by means of the Trail Making Test, Part B [19]. Except for Verbal IQ, all scores are  
 123 given as percentiles.



124 <sup>a</sup>Full Scale IQ; <sup>b</sup>Logical Memory Delayed Recall; <sup>c</sup>Rey Auditory Verbal Learning Test score; <sup>d</sup>3-minute  
 125 delayed version of the Rey-Osterreith Complex Figures Test; <sup>e</sup>Spanish Neuropsychological Exam  
 126 Equivalent Version; <sup>f</sup>Wide Range Achievement Test Spelling Score, <sup>g</sup>Woodcock-Johnson III

| Participant | Macro-stimulation |      |                  |       | Micro-stimulation |       |                  |      | Seizure Onset Area                 |
|-------------|-------------------|------|------------------|-------|-------------------|-------|------------------|------|------------------------------------|
|             | Left Entorhinal   |      | Right Entorhinal |       | Left Entorhinal   |       | Right Entorhinal |      |                                    |
|             | White             | Gray | White            | Gray  | White             | Gray  | White            | Gray |                                    |
| 1           |                   |      |                  | (X)*  |                   |       |                  |      | Bilateral Temporal                 |
| 2           |                   | X*   |                  | X*    | X                 |       |                  |      | Extra-Temporal                     |
| 3           |                   | X*   |                  | (X)*† |                   |       | (X)†             |      | Right Medial Temporal              |
| 4           |                   |      |                  | X*    |                   | (X)*† | X*               |      | Left Medial Temporal               |
| 5           |                   |      |                  |       | X*†               |       |                  |      | Right Medial Temporal              |
| 6           |                   |      |                  |       |                   | X     |                  |      | Extra-Temporal                     |
| 7           |                   |      |                  |       |                   | X*    |                  | (X)* | Right Medial Temporal              |
| 8           |                   |      |                  |       |                   |       |                  | (X)  | Right Medial Temporal              |
| 9           |                   |      |                  |       |                   |       | X*               |      | Left Medial Temporal               |
| 10          |                   |      |                  |       |                   |       | X*               |      | Extra-Temporal                     |
| 11          |                   |      |                  |       |                   |       | X                |      | Left Anterior Temporal             |
| 12          |                   |      |                  |       |                   |       | X                |      | Left Medial Temporal               |
| 13          |                   |      |                  |       |                   |       | X                |      | Left Medial Temporal               |
| 14          |                   |      |                  |       |                   |       | X*               |      | Bilateral Temporal                 |
| 15          |                   |      |                  |       |                   | X*    |                  |      | Right Temporal                     |
| 16          |                   |      |                  |       | X*                |       |                  | X*   | Right Medial Frontal               |
| 17          |                   |      |                  |       | (X)               |       |                  |      | Left Medial Temporal               |
| 18          |                   |      |                  |       |                   |       |                  | (X)* | L/R Medial Temporal                |
| 19          |                   |      |                  |       |                   |       | (X)*             |      | L/R Medial Temporal                |
| 20          |                   |      |                  |       | (X)*              |       |                  |      | L/R Medial Temporal                |
| 21          |                   |      |                  |       |                   |       | (X)*†            |      | L/R Medial Temporal                |
| 22          |                   |      |                  |       |                   |       |                  | X*   | Left Temporal and<br>ExtraTemporal |

127

128 **Table S2. Localization Details of Electrodes Used in the Study**

129 White or gray matter placements of entorhinal depth macro- and micro-electrodes for all participants, as  
 130 well as epileptogenic onset areas determined by clinical evaluation. Note that a macro electrode pair was  
 131 considered to be in white matter if at least the most distal of the bipolar macro-electrode contacts was  
 132 fully in white matter. A red (X) denotes an electrode that fell within an area that was later determined to  
 133 be epileptogenic. \*Anti-epileptic drug(s) were administered to participant within 24 hours of stimulation  
 134 session at given electrode at least once. †The associated hemisphere was diagnosed with mesial  
 135 temporal sclerosis.

136

| Participant | Electrode Label | Electrode Type | Localization (Contact 1) | Localization (Contact 2) |
|-------------|-----------------|----------------|--------------------------|--------------------------|
| 1           | REC             | Macro          | Perirhinal Cortex        | Perirhinal Cortex        |
| 2           | LEC             | Macro          | Perirhinal Cortex        | Perirhinal Cortex        |
| 2           | REC             | Macro          | Perirhinal Cortex        | Fusiform Gyrus           |
| 3           | REC             | Macro          | Perirhinal Cortex        | Fusiform Gyrus           |
| 3           | LEC             | Macro          | Perirhinal Cortex        | Fusiform Gyrus           |
| 4           | REC             | Macro          | Hippocampus (Subiculum)  | Hippocampus (Subiculum)  |
| 4           | LEC             | Micro          | Entorhinal Cortex        | N/A                      |
| 6           | LEC             | Micro          | Entorhinal Cortex        | N/A                      |
| 7           | REC             | Micro          | Entorhinal Cortex        | N/A                      |
| 7           | LEC             | Micro          | Entorhinal Cortex        | N/A                      |
| 8           | REC             | Micro          | Hippocampus (Subiculum)  | N/A                      |
| 15          | LEC             | Micro          | Subiculum                | N/A                      |
| 16          | REC             | Micro          | Entorhinal Cortex        | N/A                      |
| 18          | REC             | Micro          | Entorhinal Cortex        | N/A                      |
| 22          | REC             | Micro          | Entorhinal Cortex        | N/A                      |

137

138 **Table S3. Specific Localization Details of Electrodes not localized to Entorhinal White Matter.**

139 15 stimulating micro-electrodes or macro-electrode pairs fell within gray matter of the medial temporal  
 140 subregions. Electrode clinical labels include right entorhinal cortex (REC) and left entorhinal cortex

141 (LEC). However, for each stimulated macro-electrode pair (contact 1 is more distal than contact 2) or  
 142 micro-electrode, contacts were in fact localized to entorhinal cortex (more inferior medial placements),  
 143 perirhinal cortex (more lateral inferior placement), or hippocampal subiculum (more superior  
 144 placement). Micro-electrode contacts (both stimulating and reference electrode) are localized to the  
 145 same region (contact 1) and therefore localization of contact 2 is not applicable (N/A). All white matter  
 146 stimulating electrodes were localized to the angular bundle (Participant 19 to parahippocampal white  
 147 matter; all others to entorhinal white matter, both of which are known to contain perforant pathway  
 148 fibers [20]).  
 149

| Participant | Memory Task | White/Gray | Left/Right | Macro/Micro |
|-------------|-------------|------------|------------|-------------|
| 1           | Face-Name   | Gray       | Right      | Macro       |
| 2           | Face-Name   | Gray       | Right      | Macro       |
|             | Object      | Gray       | Left       | Macro       |
|             | Object      | White      | Left       | Micro       |
|             | Person      | White      | Left       | Micro       |
| 3           | Face-Name   | White      | Right      | Micro       |
|             | Face-Name   | Gray       | Right      | Macro       |
|             | Face-Name   | Gray       | Left       | Macro       |
|             | Person      | White      | Right      | Micro       |
| 4           | Face-Name   | White      | Right      | Micro       |
|             | Face-Name   | Gray       | Left       | Micro       |
|             | Object      | Gray       | Right      | Macro       |
|             | Object      | Gray       | Left       | Micro       |
|             | Object      | White      | Right      | Micro       |
|             | Person      | Gray       | Left       | Micro       |
| 5           | Object      | White      | Left       | Micro       |
|             | Person      | White      | Left       | Micro       |
| 6           | Person      | Gray       | Left       | Micro       |
| 7           | Person      | Gray       | Left       | Micro       |
|             | Person      | Gray       | Right      | Micro       |
| 8           | Person      | Gray       | Right      | Micro       |
| 9           | Person      | White      | Right      | Micro       |
| 10          | Person      | White      | Right      | Micro       |
| 11          | Object      | White      | Right      | Micro       |
| 12          | Person      | White      | Right      | Micro       |

|    |           |       |       |       |
|----|-----------|-------|-------|-------|
| 13 | Person    | White | Right | Micro |
| 14 | Person    | White | Right | Micro |
| 15 | Person    | Gray  | Left  | Micro |
| 16 | Person    | Gray  | Right | Micro |
|    | Person    | White | Left  | Micro |
| 17 | Object    | White | Left  | Micro |
| 18 | Object    | Gray  | Right | Micro |
| 19 | Face-Name | White | Right | Micro |
| 20 | Face-Name | White | Left  | Micro |
|    | Object    | White | Left  | Micro |
| 21 | Object    | White | Right | Micro |
| 22 | Object    | Gray  | Right | Micro |

150

151 **Table S4. Summary of experiments in each participant.** Shown is the type of memory task completed  
152 by each participant and the region of stimulation (white/gray, left/right hemisphere, and macro/micro-  
153 stimulation). All macro-stimulation sessions used the following parameters: 50 Hz (frequency), 300  
154  $\mu$ sec (pulse width), 0.4 – 6 mA (current amplitude, depending on the after-discharge threshold, see  
155 Methods). All micro-stimulation sessions used a theta-burst protocol: one waveform of 4-pulses at 100  
156 Hz (frequency), 200  $\mu$ sec (pulse width), 100  $\mu$ sec (inter-pulse interval), 150  $\mu$ A (current amplitude),  
157 repeated every 200 msec. Stimulation duration was 3 sec for object recognition and face-name  
158 associative memory and 1 sec for person recognition.

159

160 **Data file S1. All data used in the manuscript.** This file contains data for each experimental session  
161 included in the analysis. Each row contains the following information: ParticipantID is a numerical tag  
162 for each participant; SessionNum is greater than one if a participant completed the same task more than  
163 once. BlockNumber indicates the block within a single experimental session. For Person Recognition  
164 and Object Recognition, BlockNumber is always 1, because stimuli were not repeated. For Face Name  
165 Associative Memory, Block Number increases from 1 to 6 within each Session Number. To assess the  
166 effect of stimulation at the end of learning, only Block 6 was included in analysis. White is 1 if the  
167 stimulating electrode was localized to white matter and 0 otherwise. Right is 1 if the stimulating

168 electrode was in the right hemisphere and 0 otherwise. Macro is 1 if the stimulating electrode was a pair  
169 of macro electrodes and 0 if it was a micro electrode. BehavioralTask is the name of the task completed,  
170 and BehTaskNum is a numerical code for the same variable. DifferenceScore is the main measure  
171 analyzed and indicates the fraction difference between memory of stimulated and non-stimulated items  
172 (positive numbers indicate better performance on stimulated items).

173

174 **Source code S1. SPSS Syntax file for completing analysis.** All analysis was completed in SPSS. After  
175 opening Data file S1, the syntax file will produce relevant SPSS output.

176

## 177 **References (Supplementary Material Section Only)**

- 178 [1] Versluis A, Uyttenbroek E. Exactitudes. 1st ed.: nai010 Publishers; 2002.
- 179 [2] Titiz AS, Hill MRH, Mankin EA, Aghajan ZM, Eliashiv D, Tchemodanov N, et al. Theta-burst  
180 microstimulation in the human entorhinal area improves memory specificity. *Elife* 2017;6.  
181 <https://doi.org/10.7554/eLife.29515>
- 182 [3] Brady TF, Konkle T, Alvarez GA, Oliva A. Visual long-term memory has a massive storage  
183 capacity for object details. *Proceedings of the National Academy of Sciences* 2008;105(38):14325.  
184 <https://doi.org/10.1073/pnas.0803390105>
- 185 [4] Gumprecht HK, Widenka DC, Lumenta CB. BrainLab VectorVision Neuronavigation System:  
186 technology and clinical experiences in 131 cases. *Neurosurgery* 1999;44(1):97-104; discussion -5.  
187 <https://doi.org/10.1097/00006123-199901000-00056>
- 188 [5] Schlaier J, Warnat J, Dorenbeck U, Proescholdt M, Schebesch K-M, Brawanski A. Image fusion  
189 of MR images and real-time ultrasonography: evaluation of fusion accuracy combining two commercial  
190 instruments, a neuronavigation system and a ultrasound system. *Acta Neurochir (Wien)*  
191 2004;146(3):271-7. <https://doi.org/10.1007/s00701-003-0155-6>
- 192 [6] Jenkinson M, Bannister P, Brady M, Smith S. Improved optimization for the robust and accurate  
193 linear registration and motion correction of brain images. *Neuroimage* 2002;17(2):825-41.
- 194 [7] Jenkinson M, Smith S. A global optimisation method for robust affine registration of brain  
195 images. *Med Image Anal* 2001;5(2):143-56. [https://doi.org/10.1016/s1361-8415\(01\)00036-6](https://doi.org/10.1016/s1361-8415(01)00036-6)
- 196 [8] Pluta J, Yushkevich P, Das S, Wolk D. In vivo analysis of hippocampal subfield atrophy in mild  
197 cognitive impairment via semi-automatic segmentation of T2-weighted MRI. *J Alzheimers Dis*  
198 2012;31(1):85-99. <https://doi.org/10.3233/jad-2012-111931>
- 199 [9] Yushkevich PA, Wang H, Pluta J, Das SR, Craige C, Avants BB, et al. Nearly automatic  
200 segmentation of hippocampal subfields in in vivo focal T2-weighted MRI. *Neuroimage*  
201 2010;53(4):1208-24. <https://doi.org/10.1016/j.neuroimage.2010.06.040>
- 202 [10] Amaral DG, Insausti R. The hippocampal formation. In: Paxinos G, editor *The Human Nervous*  
203 *System*, San Diego: Academic Press; 1990, p. 711-55.
- 204 [11] Duvernoy HM, Bourgouin P. *The Human Hippocampus: Functional Anatomy, Vascularization,*  
205 *and Serial Sections with MRI*. Berlin: Springer; 1998.

- 206 [12] Zhang Y, Brady M, Smith S. Segmentation of brain MR images through a hidden Markov  
207 random field model and the expectation-maximization algorithm. *IEEE Trans Med Imaging*  
208 2001;20(1):45-57. <https://doi.org/10.1109/42.906424>
- 209 [13] Ekstrom A, Suthana N, Behnke E, Salamon N, Bookheimer S, Fried I. High-resolution depth  
210 electrode localization and imaging in patients with pharmacologically intractable epilepsy. *J Neurosurg*  
211 2008;108(4):812-5. <https://doi.org/10.3171/jns.2008.108.4.0812>
- 212 [14] Suthana NA, Ekstrom AD, Moshirvaziri S, Knowlton B, Bookheimer SY. Human hippocampal  
213 CA1 involvement during allocentric encoding of spatial information. *J Neurosci* 2009;22:2231-7.  
214 <https://doi.org/10.1523/JNEUROSCI.0621-09.2009>
- 215 [15] Zeineh MM, Engel SA, Thompson PM, Bookheimer SY. Dynamics of the hippocampus during  
216 encoding and retrieval of face-name pairs. *Science* 2003;299(5606):577-80.
- 217 [16] Wechsler D. Wechsler Memory Scale, revised. New York: Psychological Corporation/ Harcourt  
218 Brace Jovanovich; 2005.
- 219 [17] Delis DC, Kramer JH, Kaplan E, Ober BA. California Verbal Learning Test. 2 ed. San Antonio,  
220 TX: Psychological Corporation; 2000.
- 221 [18] Meyers JE, Meyers KR, Rey. Complex Figure Test and recognition trial. Odessa, FL:  
222 Psychological Assessment Resources; 1995.
- 223 [19] Reitan RM. Trail Making Test: Manual for administration and scoring. Reitan Neuropsychology  
224 Laboratory; 1992.
- 225 [20] Yassa MA, Muftuler LT, Stark CE. Ultrahigh-resolution microstructural diffusion tensor  
226 imaging reveals perforant path degradation in aged humans in vivo. *Proceedings of the national*  
227 *academy of sciences* 2010;107(28):12687-91. <https://doi.org/10.1073/pnas.1002113107>
- 228
